# Supplementary material for: Acute impacts of mixed heavy metals and diclofenac on sludge activity and enzyme activity involved with biological nitrogen removal
Source: Royal Society of Chemistry journal article supplement (doi:10.1039/d1ew00359c), 2021-01-01
Supplement: d1ew00359c1.pdf [file d1ew00359c1.pdf]

Table S1 Experimental plan

| Reactors | Concentration (mg L <sup>-1</sup> ) |        |        |     |
|----------|-------------------------------------|--------|--------|-----|
|          | Zn(II)                              | Cu(II) | Cr(VI) | DCF |
| S0*      | 0                                   | 0      | 0      | 0   |
| S1       | 3                                   | 0      | 0      | 30  |
| S2       | 0                                   | 3      | 0      | 0   |
| S3       | 0                                   | 0      | 3      | 0   |
| S4       | 0                                   | 0      | 0      | 0   |
| S5       | 3                                   | 0      | 0      | 30  |
| S6       | 0                                   | 3      | 0      | 0   |
| S7       | 0                                   | 0      | 3      | 0   |

\*: Seeding sludge
